# Supplementary material
Source: PubMed Central journal article supplement (PMC5339753)
Supplement: 10.1074_M116.765917_jbc.M116.765917-1.pdf [file 10.1074_M116.765917_jbc.M116.765917-1.pdf]

# Supplemental Fig. 1

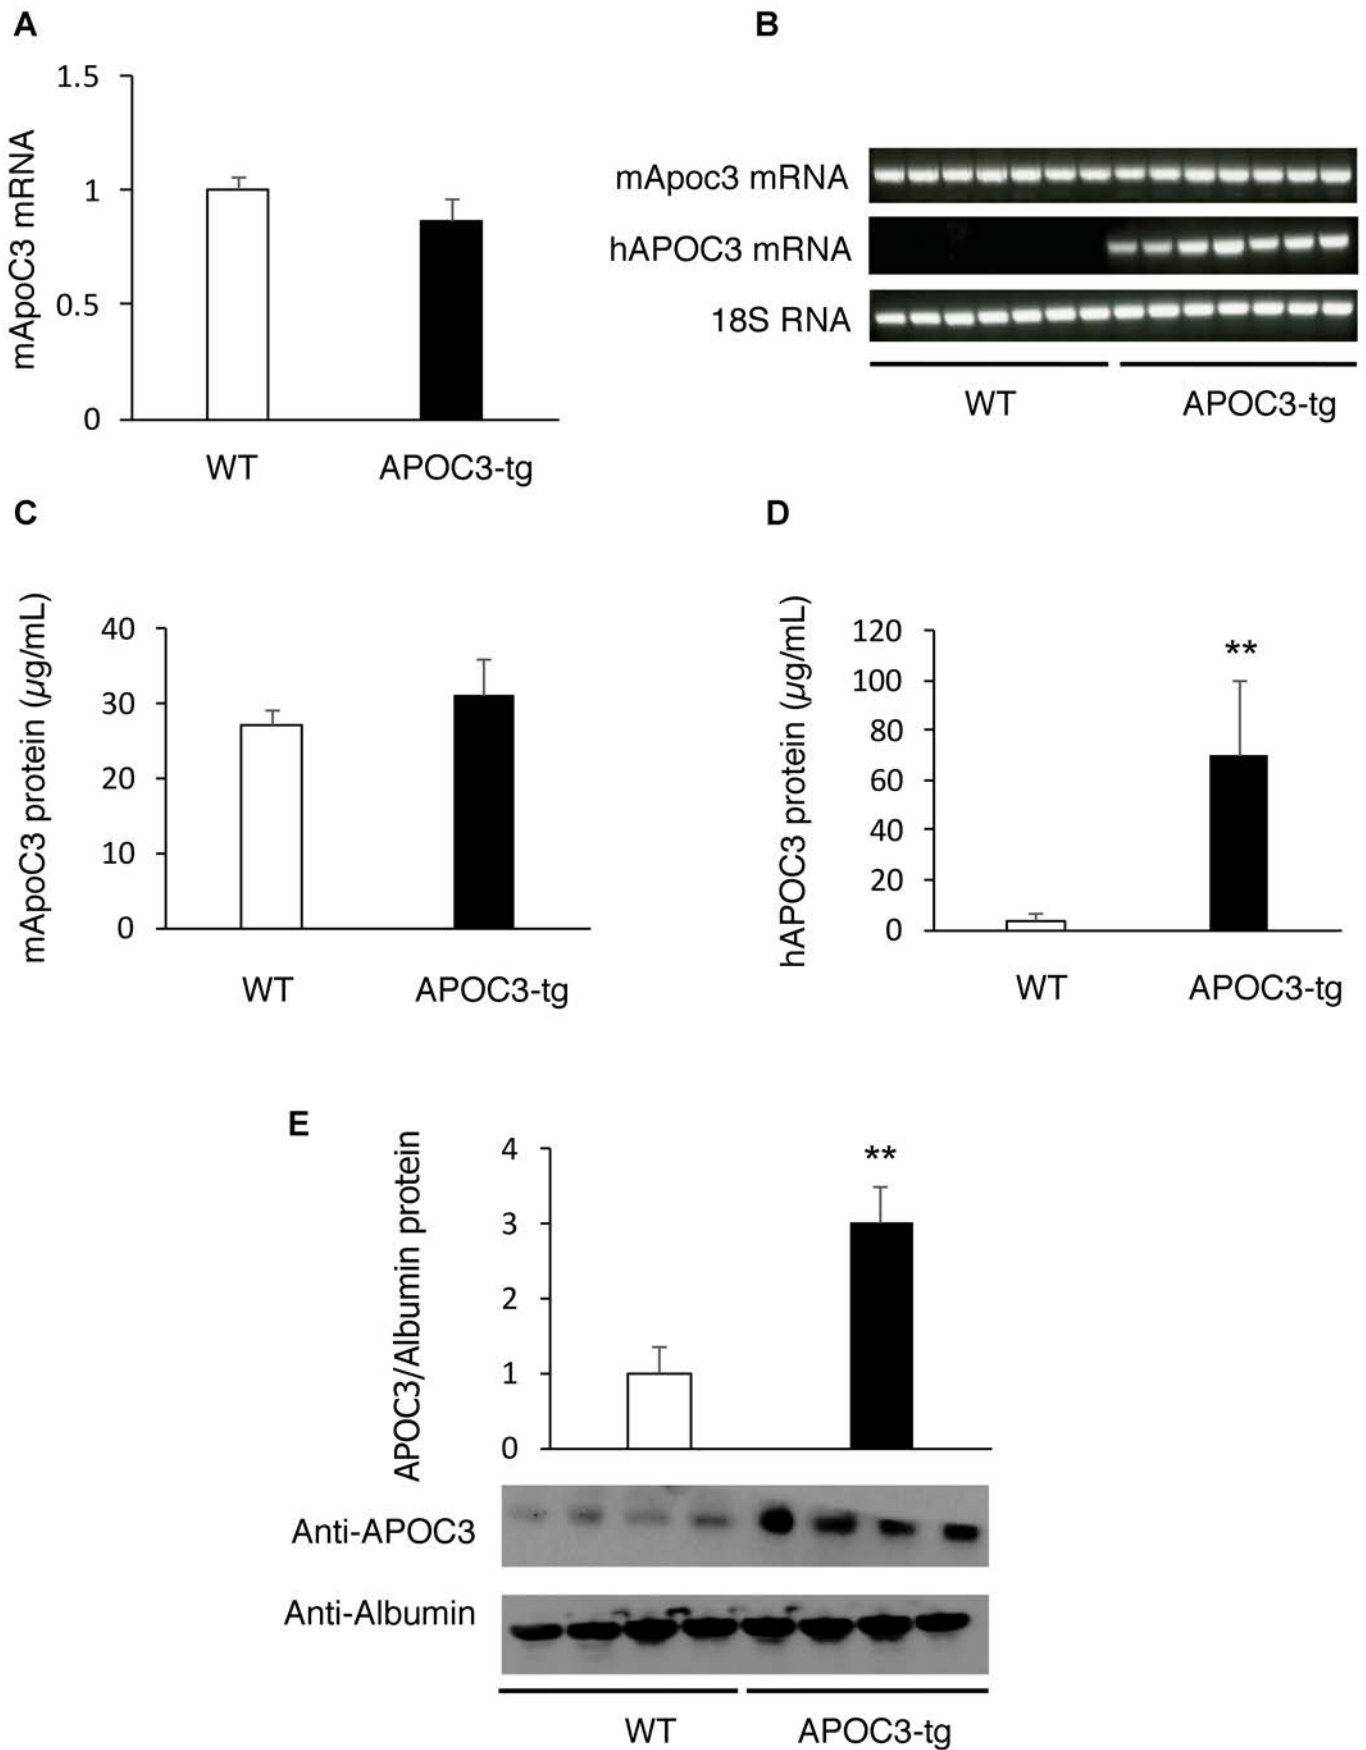

## Figure legend

### ***Supplemental Figure 1. Effect of APOC3-tg expression on endogenous ApoC3 production in APOC3-tg mice.***

APOC3-tg and WT littermates (male, 6 weeks old, n=5-8/group) were fed a high fat diet for 10 months. Mice were euthanized under non-fasting conditions and liver tissues were subjected to real-time RT-qPCR assay for determining mouse-specific mApoC3 mRNA levels, using 18S RNA as a control (A). After real-time RT-qPCR analysis, the samples were resolved on 1% agarose gel, followed by visualization of the RT-PCR products under the UV light (B). In addition, aliquots of plasma (25  $\mu$ L) from high fat-fed APOC3-tg and WT mice were subjected to species-specific ELISA assay for determining mouse mApoC3 protein (C) and human hAPOC3 protein (D), respectively. Additional aliquots of plasma at a fixed protein concentration (15  $\mu$ g) from high fat-fed APOC3-tg and WT mice were subjected to immunoblot assay, using anti-APOC3 antibody that were capable of cross-reacting with both mouse and human APOC3 proteins for determining total plasma APOC3 proteins (E). Anti-albumin antibody was used as a control in this immunoblot assay. \*\* $p$ <0.001 vs. WT control.

**Supplemental Table 1. Plasma lipid profiles in WT and APOC3-tg mice on regular chow**

| Sex                                        | Male      |                        | Female    |                       |
|--------------------------------------------|-----------|------------------------|-----------|-----------------------|
| Genotype                                   | <i>WT</i> | <i>APOC3-tg</i>        | <i>WT</i> | <i>APOC3-tg</i>       |
| Body weight (g)                            | 38±1.3    | 40±1.4                 | 27±1.4    | 28±1.8                |
| Plasma TG (mg/dL)                          | 128±8     | 691±79 <sup>a</sup>    | 103±17    | 470±65 <sup>a</sup>   |
| Plasma cholesterol (mg/dL)                 | 98±6      | 191±22 <sup>a</sup>    | 118±11    | 244±17 <sup>a</sup>   |
| Plasma NEFA (mmol/L)                       | 0.63±0.06 | 1.27±0.23 <sup>b</sup> | 0.5±0.04  | 1.0±0.17 <sup>b</sup> |
| Hepatic TG content (mg/g protein)          | 221±24    | 247±37                 | 193±23    | 205±33                |
| Hepatic cholesterol content (mg/g protein) | 69±4      | 71±3                   | 58±2      | 59±3                  |

Plasma TG, cholesterol and NEFA levels were determined after 16-h fasting in APOC3-tg and WT littermates at 7 months of age (male, n=8/group and female, n=5/group). Mice were euthanized under non-fasting conditions and liver tissues were procured for the determination of hepatic TG and cholesterol contents. <sup>a</sup>  $p < 0.001$  and <sup>b</sup>  $p < 0.05$  vs. WT control.

**Supplemental Table 2. Primers for real-time quantitative RT-PCR assay**

| Name                   | Nucleotide sequence       |
|------------------------|---------------------------|
| ApoB reverse           | TGCGGACGCCGTTACTGCTG      |
| ApoB reverse           | CAGATTTGGGGGACCTCCAG      |
| Mttp forward           | CGAGCCAGTGGGCATAGAAA      |
| Mttp reverse           | AAAGCCCTGGTCTCTTCTGC      |
| ACOX1 forward          | TCCCGATCTGCGCAAGGAGC      |
| ACOX1 reverse          | CTGGTGAAGCAAGGTGGGCA      |
| CPT1 forward           | GCACTGCAGCTCGCACATTACAA   |
| CPT1 reverse           | CTCAGACAGTACCTCCTTCAGGAAA |
| PPAR- $\alpha$ forward | CCTGAACATCGAGTGTCTGAATAT  |
| PPAR- $\alpha$ reverse | GGTCTTCTTCTGAATCTTGCAGCT  |
| SREBP-1c forward       | GGAGCCATGGATTGCACATT      |
| SREBP-1c reverse       | GCTTCCAGAGAGGAGGCCAG      |
| ACC forward            | TGACAGACTGATCGCAGAGAAAG   |
| ACC reverse            | TGGAGAGCCCCACACACA        |
| FAS forward            | GCTGCGGAAACTTCAGGAAAT     |
| FAS reverse            | AGAGACGTG TCACTCCTGGACTT  |
| PPAR- $\gamma$ forward | GGAATCAGCTCTGTGGACCT      |
| PPAR- $\gamma$ reverse | TGAGGCCTGTTGTAGAGCTG      |
| PGC-1 $\beta$ forward  | GCTCTCGTCCTTCTTCTCA       |
| PGC-1 $\beta$ reverse  | GTAAGCGCAGCCAAGAGAG       |
| F4/80 forward          | TGGATAGGTCAGGCATGGAG      |
| F4/80 reverse          | GCCTAGGCAAGTTTTGGCTG      |
| TNF $\alpha$ forward   | CATGATCCGGGACGTGGAAC      |
| TNF $\alpha$ reverse   | TGGTGGTTTGCTACGACGTG      |
| IL-1 $\beta$ forward   | GCAACTGTTCTGAACTCAA       |
| IL-1 $\beta$ reverse   | AGAAGGTGCTCATGTCTCA       |
| IL-10 forward          | TGGCTGATCCCTTTGCCTTT      |
| IL-10 reverse          | GCTGCAGAAGACTCTGGGTAG     |
| IL-6 forward           | CACTTCACAAGTCCGAGGCT      |
| IL-6 reverse           | CCAGACAGGAAAGGAACCCC      |
| APOC3 forward          | CAGCCCCGGACGCTCCTCAC      |
| APOC3 reverse          | CGACTCAATAGCTGGAGTTG      |
| hAPOC3 forward         | CAGCCCAGTCCACCCAG         |
| hAPOC3 reverse         | GCAAGGAAGTGCCTGTGAG       |
| INS-1 forward          | CTTGCCCTCTGGGAGCCCA       |
| INS-1 reverse          | TGAAGGTCCCCGGGGCTTC       |
| INS-2 forward          | CTTCCTCTGGGAGTCCAC        |
| INS-2 reverse          | CACCTGCTCCCGGGCCTCCA      |
| GK forward             | TGGATGACAGAGCCAGGATGG     |
| GK reverse             | ACTTCTGAGCCTTCTGGGGTG     |
| Glut2 forward          | TCAGAAGACAAGATCACCGG      |
| Glut2 reverse          | GTGAGCAGATCCTTCAGTCT      |
| PDX-1 forward          | AGCAGTACTACGCGGCCACA      |
| PDX-1 reverse          | GCACTTCGTATGGGGAGATG      |
| NeuroD forward         | GATCGTCACTATTCAGAACC      |
| NeuroD reverse         | CCTCTAGATCCTCATCTTCC      |
| FoxA2 reverse          | CTGGGAGCCGTGAAGATGGA      |

---

|                 |                       |
|-----------------|-----------------------|
| FoxA2 reverse   | TGAGCCGTCATGCCCCGCCA  |
| IRS-1 forward   | GCGAGCCCTCCGGATACC    |
| IRS-1 reverse   | GTGTAGAGAGCCACCAGGTGC |
| IRS-2 forward   | AGCAGAAGCACGGCCACAA   |
| IRS-2 reverse   | TGCTCGTTCTCCGCCGCTA   |
| 18S RNA forward | AAACGGCTACCACATCCAAG  |
| 18S RNA reverse | CCTCCAATGGATCCTCGTTA  |

---

All nucleotide sequences are in 5'-to-3' orientation and were purchased from Integrated DNA Technologies (Coralville, IA). All primers are complementary to the corresponding genes in mice, except for the hAPOC3 primers that are complementary to human APOC3 cDNA.
